# Supplementary material for: Dual Hypocretin Receptor Antagonism Is More Effective for Sleep Promotion than Antagonism of Either Receptor Alone
Source: PubMed Central journal article supplement (PMC3388080; doi:10.1371/journal.pone.0039131), 2012-07-02

Figure S5

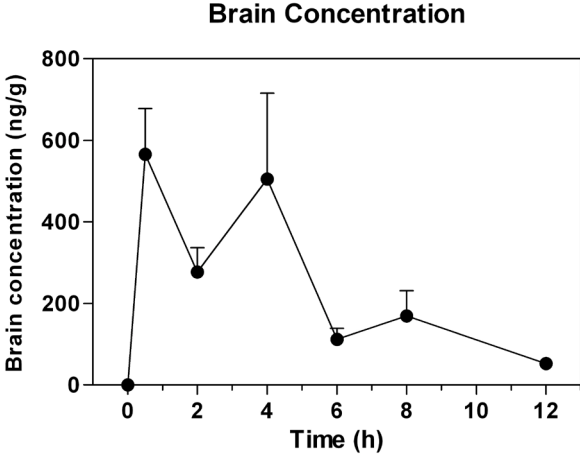

Supplement: pone.0039131.s006.pdf [file pone.0039131.s006.pdf]
